# Supplementary material
Source: PubMed Central journal article supplement (PMC3537217)
Supplement: ASN.2012060571_ASN2012060571SupplementaryData.pdf [file ASN.2012060571_ASN2012060571SupplementaryData.pdf]

## SUPPLEMENTAL ONLINE DATA

### TITLE

Properdin deficiency exacerbates C3 glomerulopathy in factor H-deficient mice

### AUTHORS

M.M. Ruseva<sup>1</sup>, K.A. Vernon<sup>1</sup>, A.M. Leshner<sup>2</sup>, W.J. Schwaeble<sup>3</sup>, Youssif M. Ali<sup>3</sup>, M. Botto<sup>1</sup>, H.T. Cook<sup>1</sup>, W-C Song<sup>2</sup>, C. M. Stover<sup>3</sup>, M.C. Pickering<sup>1</sup>

### Affiliations

<sup>1</sup>Centre for Complement and Inflammation Research, Imperial College, London, UK

<sup>2</sup>Department of Pharmacology and Institute for Translational Medicine and Therapeutics, University of Pennsylvania, Philadelphia, PA 19104, USA

<sup>3</sup>Department of Infection, Immunity and Inflammation, University of Leicester, Leicester, UK

### LIST OF SUPPLEMENTAL FIGURES:

1. Representative microscopic images of glomeruli from 38-week old *CFH*<sup>-/-</sup> and *CFH*<sup>-/-</sup>.*P*<sup>-/-</sup> mice.
2. Glomerular neutrophil scores during heterologous NTN.
3. Glomerular C9 reactivity in *CFH*<sup>-/-</sup>.*P*<sup>-/-</sup> mice.
4. Glomerular C3 immunostaining using two monoclonal anti-C3 antibodies with differential reactivity to tissue-bound C3 fragments.
5. Tubulo-interstitial C3 immunostaining in wild-type, *P*<sup>-/-</sup>, *CFH*<sup>-/-</sup> and *CFH*<sup>-/-</sup>.*P*<sup>-/-</sup> mice and hepatic C3 staining in *CFH*<sup>-/-</sup> and *CFH*<sup>-/-</sup>.*P*<sup>-/-</sup> mice.
6. Comparison of plasma C3 levels and glomerular C3 immunostaining in *CFH*<sup>-/-</sup>, *CFH*<sup>M/M</sup>, *CFH*<sup>-/-</sup>.*P*<sup>-/-</sup> and *CFH*<sup>M/M</sup>.*P*<sup>-/-</sup> mice.

A

*CFH*<sup>-/-</sup>

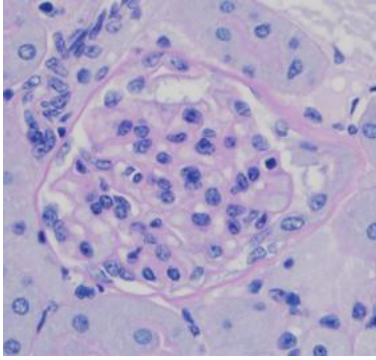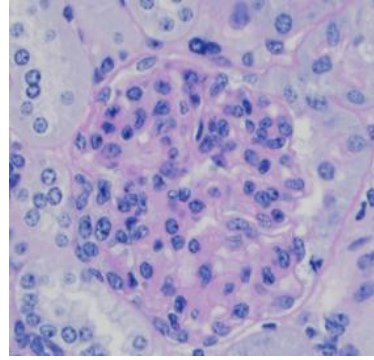

*P*<sup>-/-</sup>

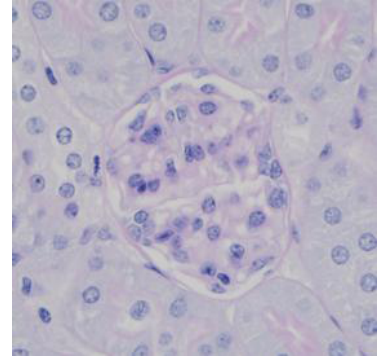

*CFH*<sup>-/-</sup>.*P*<sup>-/-</sup>

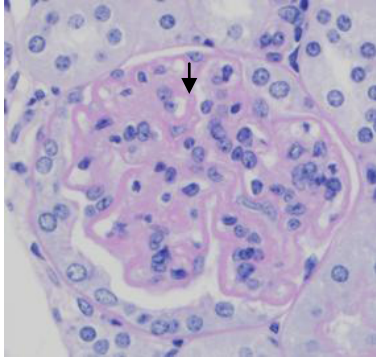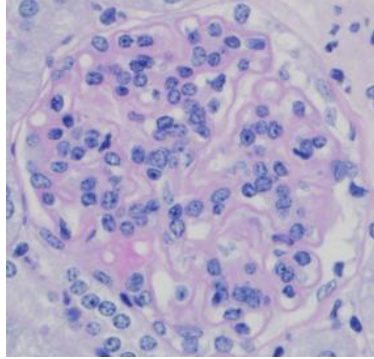

B

*CFH*<sup>-/-</sup>

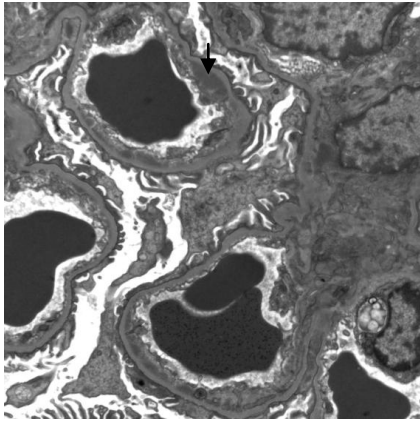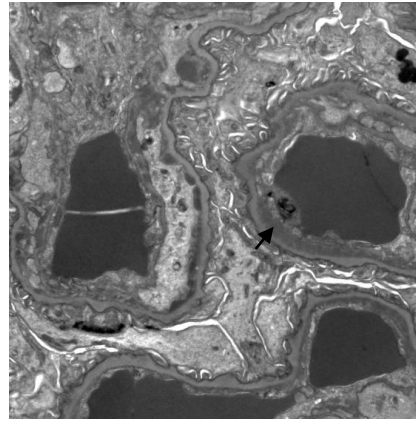

*CFH*<sup>-/-</sup>.*P*<sup>-/-</sup>

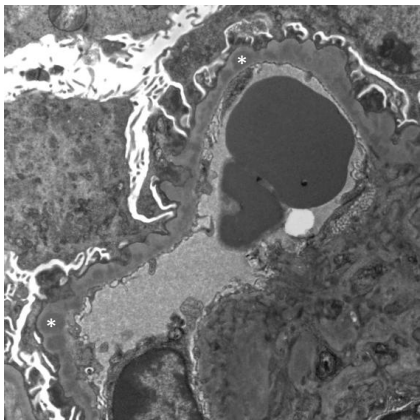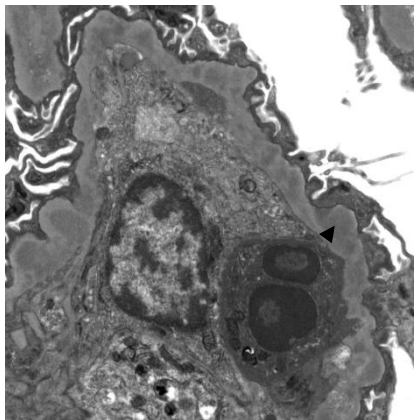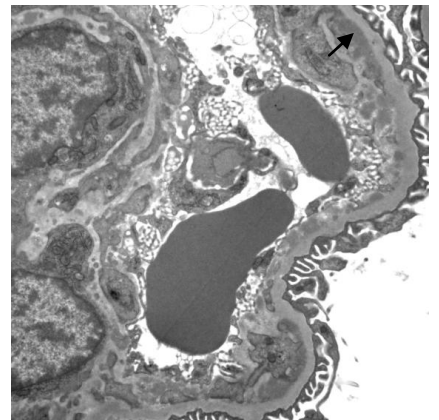

SUPPLEMENTAL FIGURE 1. Representative microscopic images of glomeruli from 38-week old *CFH*<sup>-/-</sup> and *CFH*<sup>-/-</sup>.*P*<sup>-/-</sup> mice. (A) Light microscopy of PAS-stained glomerular sections. Glomerular hypercellularity is evident in *CFH*<sup>-/-</sup> animals. *CFH*<sup>-/-</sup>.*P*<sup>-/-</sup> animals show more marked glomerular hypercellularity and capillary wall thickening with areas of capillary wall double contours (arrow) These changes were not observed in the *P*<sup>-/-</sup> mice in which the glomeruli appear normal. Original magnification x40 (B) Representative electron microscopic images of glomeruli from 38-week old *CFH*<sup>-/-</sup> and *CFH*<sup>-/-</sup>.*P*<sup>-/-</sup> mice. Subendothelial electron-dense deposits (arrows) were evident in *CFH*<sup>-/-</sup> and *CFH*<sup>-/-</sup>.*P*<sup>-/-</sup> mice. Electron-dense deposits along the subepithelial aspect (arrowhead) of the glomerular basement membrane were present in some of the *CFH*<sup>-/-</sup>.*P*<sup>-/-</sup> and not in any of the *CFH*<sup>-/-</sup> mice. Some of the subepithelial deposits are incorporated in the basement membrane (asterisks)

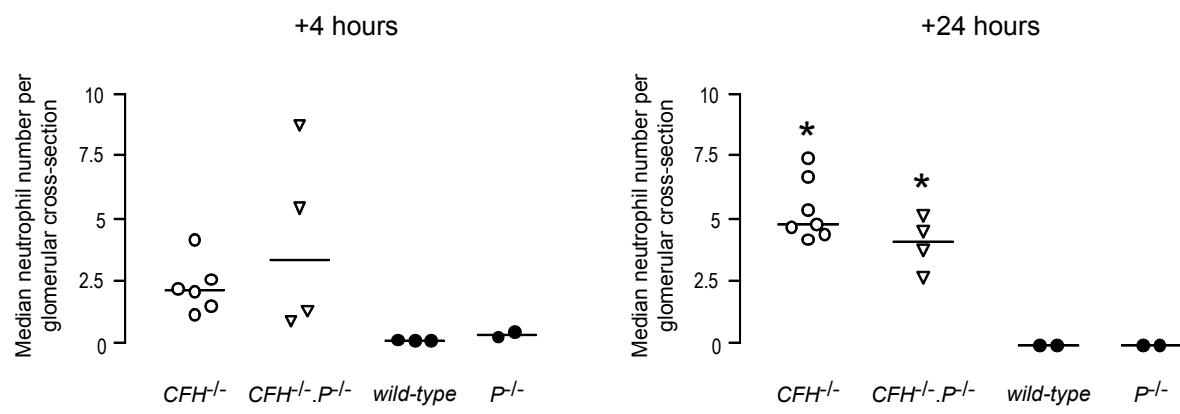

**SUPPLEMENTAL FIGURE 2. Glomerular neutrophil scores during heterologous NTN.** Median glomerular neutrophil number per glomerular cross-section at 4 and 24 hours following intravenous injection of nephrotoxic serum. Scores did not differ between *CFH*<sup>-/-</sup> and *CFH*<sup>-/-</sup>.*P*<sup>-/-</sup> mice at either time point. Horizontal bars denote median values. \*p<0.01 vs. either wild-type or *P*<sup>-/-</sup> groups, Bonferroni's Multiple Comparison Test.

A

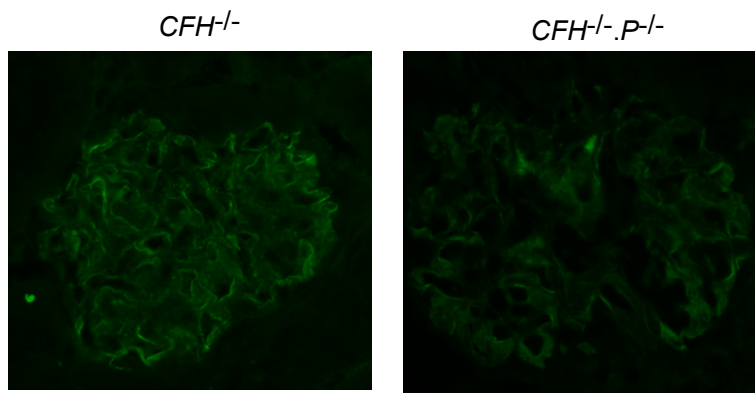

B

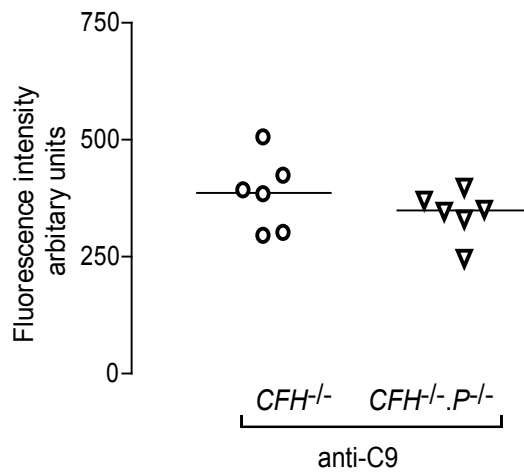

SUPPLEMENTAL FIGURE 3. **Glomerular C9 reactivity in *CFH<sup>-/-</sup>.P<sup>-/-</sup>* mice.** (A) Representative images of glomerular C9 staining in *CFH<sup>-/-</sup>* and *CFH<sup>-/-</sup>.P<sup>-/-</sup>* mice. Original magnification x40. (B) Quantitative immunofluorescence demonstrated that the median intensities did not differ between the two groups. Horizontal bars denote median values.

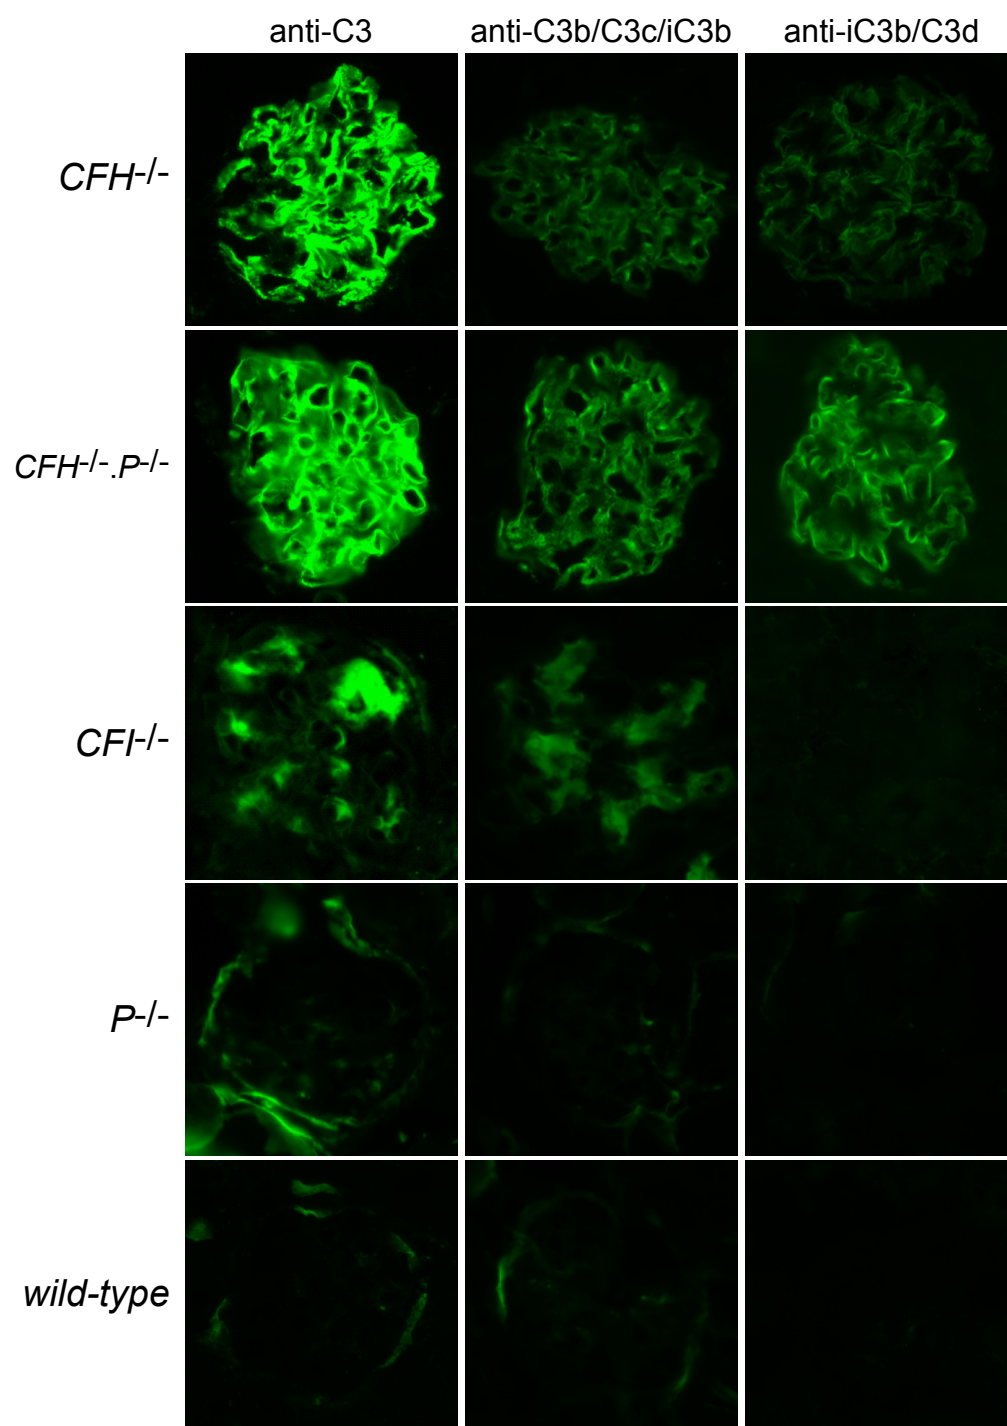

**SUPPLEMENTAL FIGURE 4. Glomerular C3 immunostaining using two monoclonal anti-C3 antibodies with differential reactivity to tissue-bound C3 fragments.** Representative images of glomerular C3 staining in *CFH*<sup>-/-</sup>, *CFH*<sup>-/-</sup>.*P*<sup>-/-</sup>, CFI-deficient mice (*CFI*<sup>-/-</sup>), *P*<sup>-/-</sup> and wild-type animals using (i) goat anti-mouse C3 polyclonal antibody (anti-C3, at a dilution of 1:100), (ii) rat anti-mouse C3b/C3c/iC3b monoclonal antibody (anti-C3b/C3c/iC3b) and (iii) mouse anti-human iC3b/C3d monoclonal antibody (iC3b/C3d). Original magnification x40.

A

*wild-type*

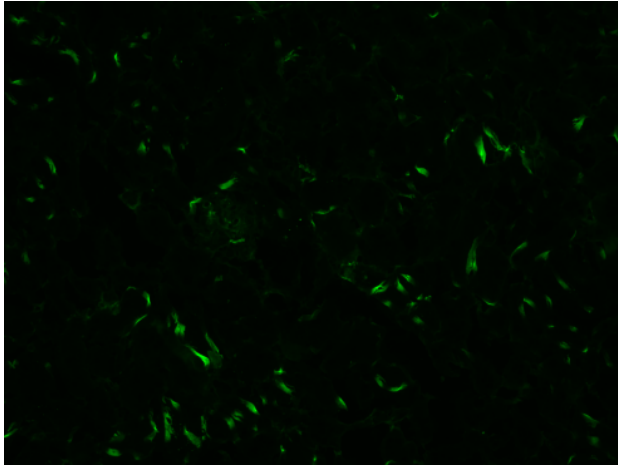

*P*<sup>-/-</sup>

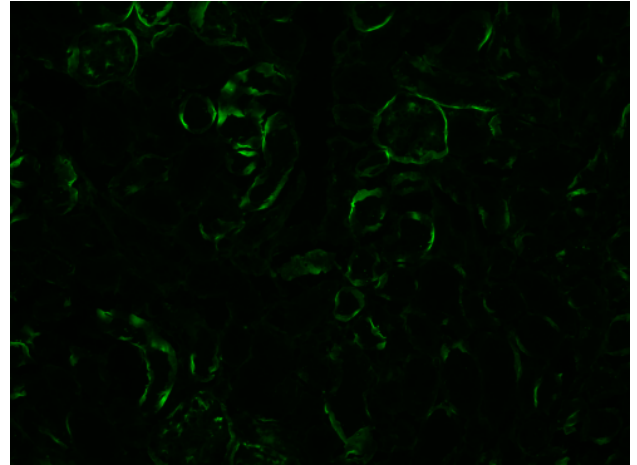

*CFH*<sup>-/-</sup>

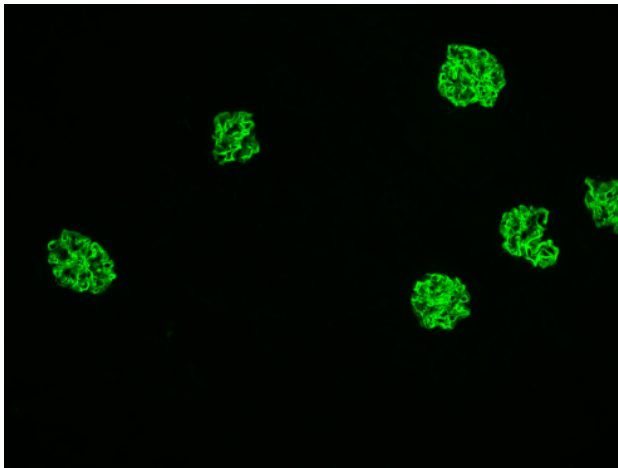

*CFH*<sup>-/-</sup>.*P*<sup>-/-</sup>

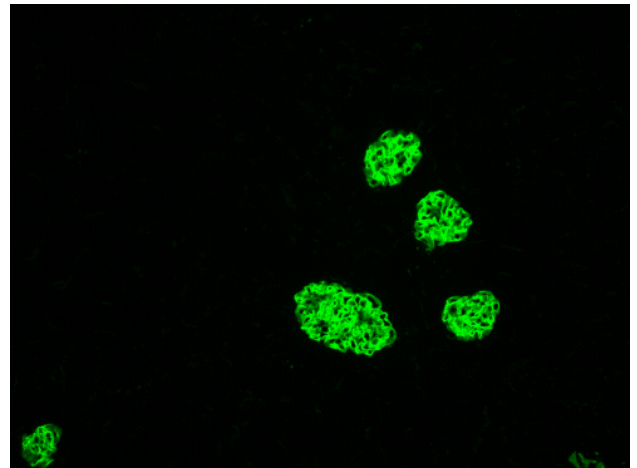

B

*CFH*<sup>-/-</sup>

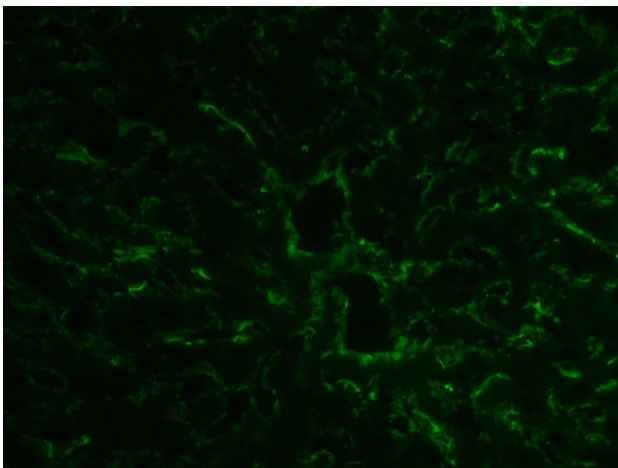

*CFH*<sup>-/-</sup>.*P*<sup>-/-</sup>

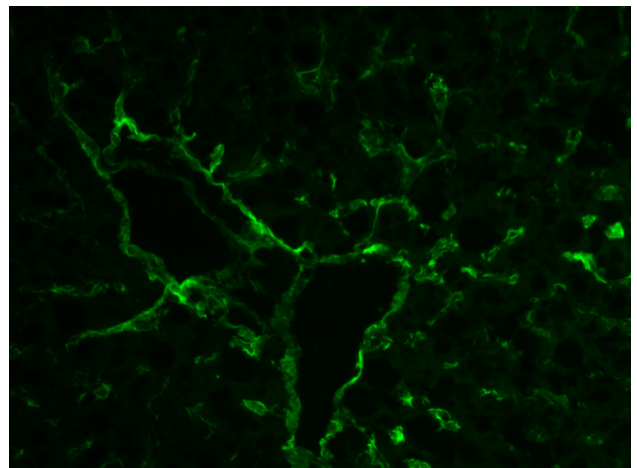

SUPPLEMENTAL FIGURE 5. **(A) Tubulo-interstitial C3 immunostaining in wild-type,  $P^{-/-}$ ,  $CFH^{-/-}$  and  $CFH^{-/-}.P^{-/-}$  mice.** Representative images of tubulo-interstitial C3 staining using a goat anti-mouse C3 polyclonal antibody (anti-C3) in wild-type,  $P^{-/-}$ ,  $CFH^{-/-}$  and  $CFH^{-/-}.P^{-/-}$  mice. Tubulo-interstitial C3 staining was identical in wild-type and  $P^{-/-}$  mice. As previously reported<sup>4</sup>, tubulo-interstitial C3 staining was absent in  $CFH^{-/-}$  mice. Similarly the staining was also absent in  $CFH^{-/-}.P^{-/-}$  mice. Original magnification x20. **(B) Hepatic C3 staining in  $CFH^{-/-}$  and  $CFH^{-/-}.P^{-/-}$  mice.** Representative images of hepatic C3 staining using a goat anti-mouse C3 polyclonal antibody (anti-C3) in  $CFH^{-/-}$  and  $CFH^{-/-}.P^{-/-}$  mice. C3 reactivity is seen within hepatic sinusoids and the central veins to a comparable extent in both groups. Original magnification x40.

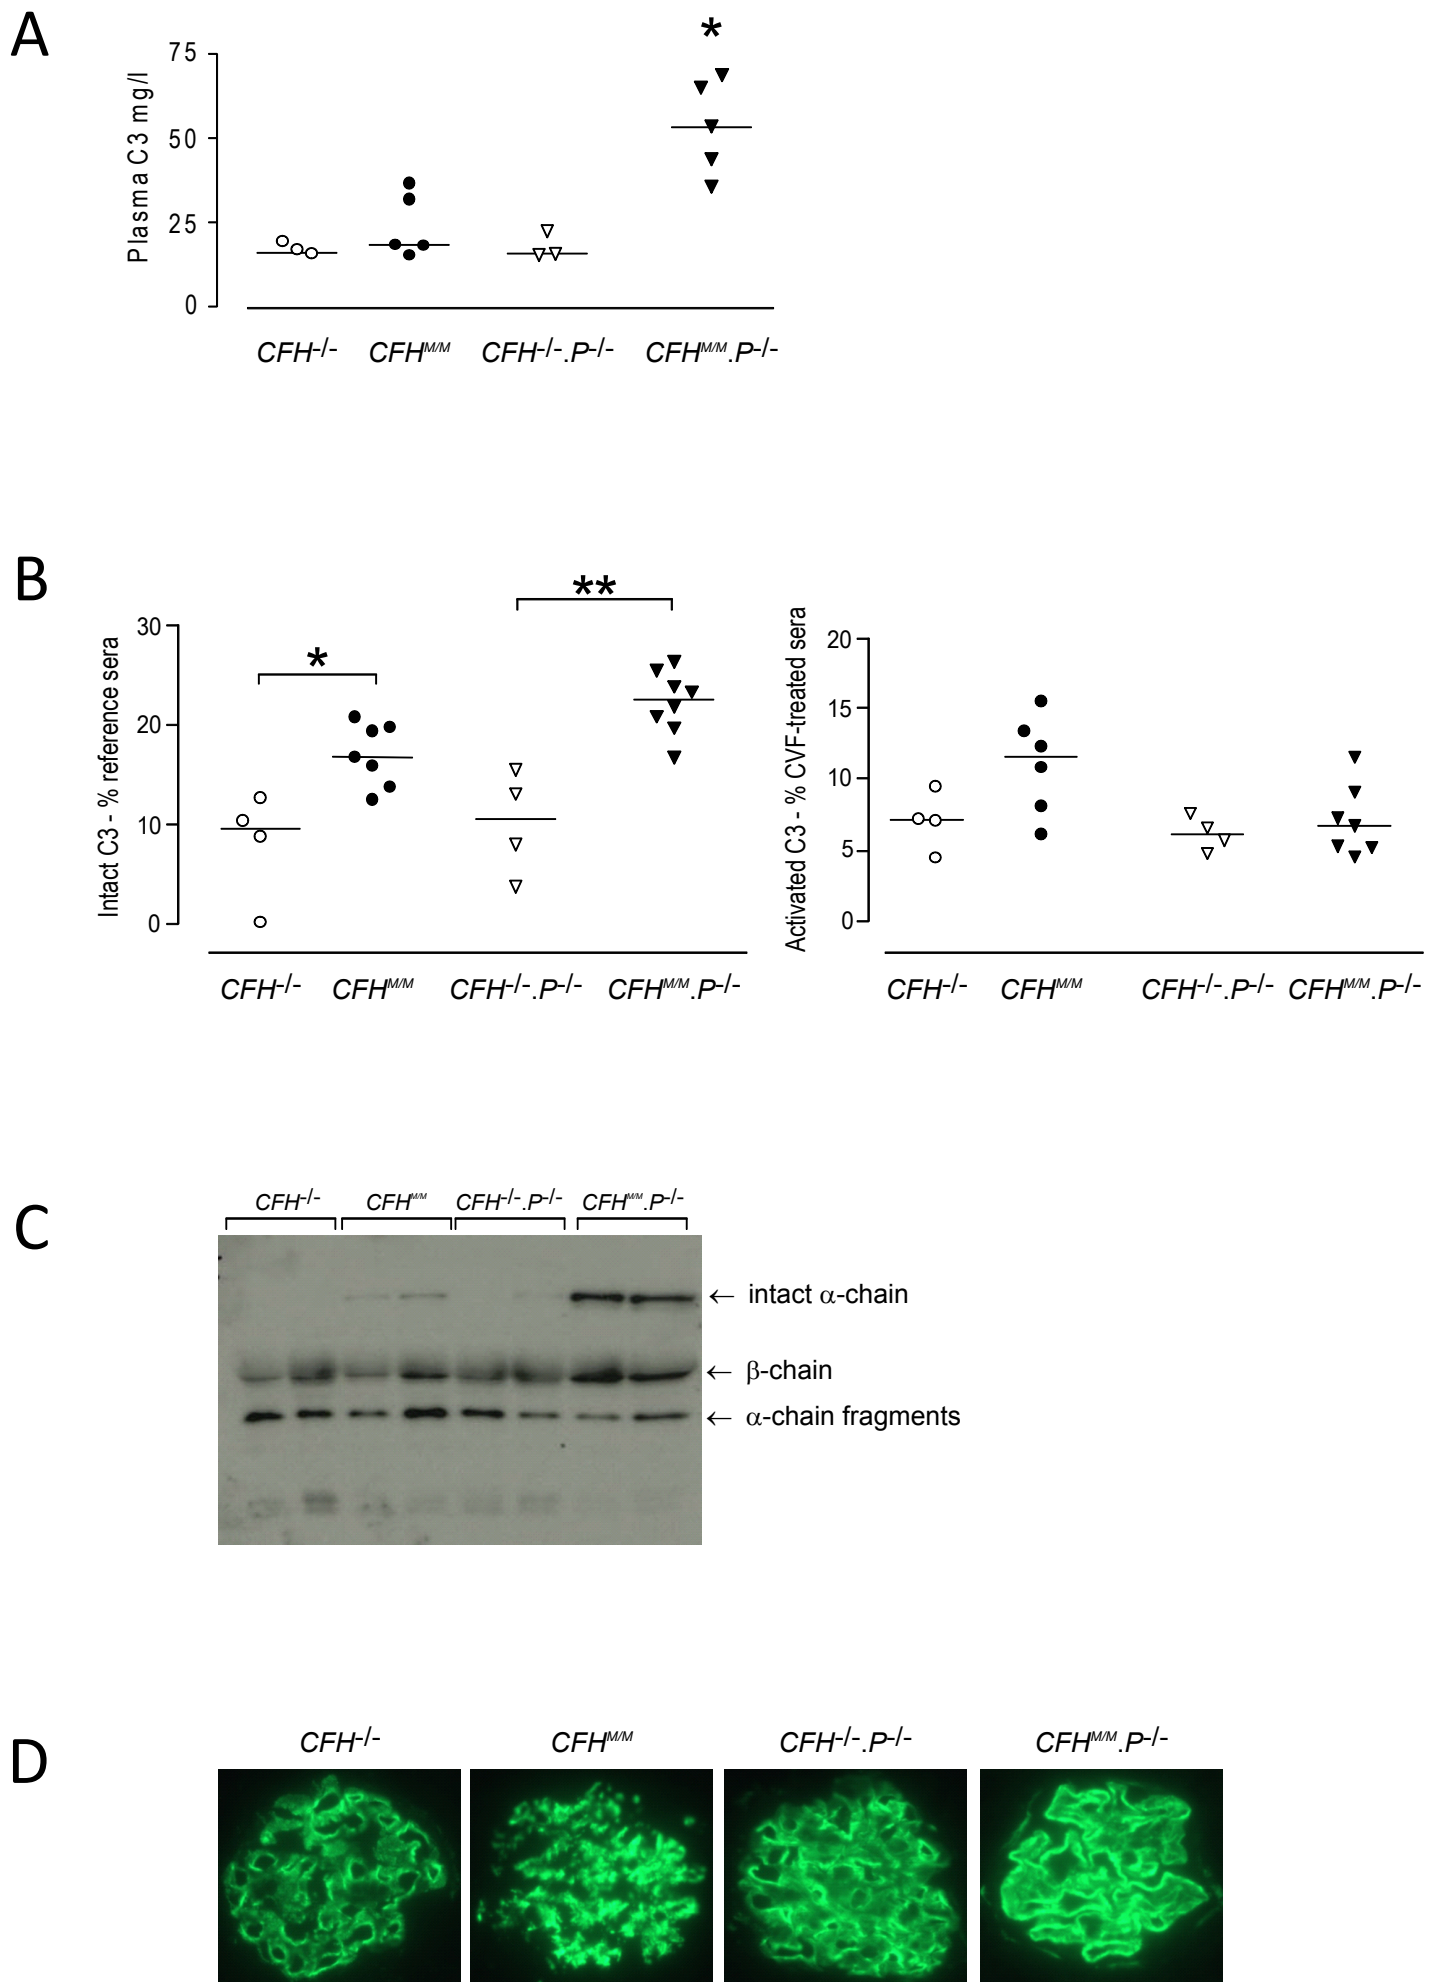

**SUPPLEMENTAL FIGURE 6. Comparison of plasma C3 levels and glomerular C3 immunostaining in  $CFH^{-/-}$ ,  $CFH^{MM}$ ,  $CFH^{-/-}.P^{-/-}$  and  $CFH^{MM}.P^{-/-}$  mice.** (A) Plasma C3 levels were reduced in all four strains although the levels were significantly higher in the  $CFH^{MM}.P^{-/-}$  mice. \*  $p < 0.01$  vs.  $CFH^{-/-}$ ,  $CFH^{MM}$  or  $CFH^{-/-}.P^{-/-}$  groups, Bonferroni's Multiple Comparison Test. Plasma C3 was measured by ELISA. Horizontal bars denote median values. (B) ELISA assays of intact and activated plasma C3 again showed that  $CFH^{MM}.P^{-/-}$  mice had the highest intact serum C3 levels. Values were normalized to reference samples as described in <sup>23</sup>. \*  $p < 0.01$  and \*\* $p = 0.004$ , Mann-Whitney test. C3 – Cobra venom factor. (C) Western blot for C3 under reducing conditions using sera from the four strains. Intact C3  $\alpha$ -chain was clearly seen in sera from  $CFH^{MM}.P^{-/-}$  mice and, with lower intensity, in sera from  $CFH^{MM}$  animals. One microlitre of EDTA plasma from the examined strains was loaded on the gel. (D) Representative images of glomerular C3 staining in  $CFH^{-/-}$ ,  $CFH^{MM}$ ,  $CFH^{-/-}.P^{-/-}$  and  $CFH^{MM}.P^{-/-}$  mice.  $CFH^{MM}$  animals had granular C3 glomerular staining pattern in contrast to the linear pattern seen in the other strains. Original magnification x40.
